# Supplementary material for: Novel silver(i) cluster-based coordination polymers as efficient luminescent thermometers
Source: Royal Society of Chemistry journal article supplement (doi:10.1039/d0ce01507e), 2020-11-11
Supplement: d0ce01507e1.pdf [file d0ce01507e1.pdf]

## Supporting Information

### **The novel silver(I) cluster-based coordination polymers as efficient luminescent thermometer**

Zhen-Zhen Xue, Xin-Yu Li, Lei Xu, Song-De Han, Jie Pan\* and Guo-Ming Wang

†College of Chemistry and Chemical Engineering, Qingdao University, Shandong 266071, P. R. China

E-mail address: [tsingtaopj@163.com](mailto:tsingtaopj@163.com)

**Table S1.** Selected bond lengths (Å) and angles (°) for **1** and **2**.

| Compound 1              |             |                          |             |
|-------------------------|-------------|--------------------------|-------------|
| Ag1—N2                  | 2.130 (3)   | Ag2—Ag1 <sup>i</sup>     | 2.9112 (4)  |
| Ag1—N13                 | 2.160 (3)   | Ag2—Ag2 <sup>i</sup>     | 3.0037 (5)  |
| Ag1—N14                 | 2.608 (3)   | Ag2—Ag4                  | 2.8938 (4)  |
| Ag1—N1                  | 2.628 (3)   | Ag3—O5W                  | 2.174 (3)   |
| Ag1—Ag2 <sup>i</sup>    | 2.9111 (4)  | Ag3—N10                  | 2.263 (3)   |
| Ag2—N15 <sup>i</sup>    | 2.161 (3)   | Ag3—N11                  | 2.378 (3)   |
| Ag2—N3                  | 2.163 (3)   | Ag4—N8                   | 2.215 (3)   |
| Ag2—N5                  | 2.631 (3)   | N14—Ag1—Ag2 <sup>i</sup> | 62.82 (7)   |
| N2—Ag1—N13              | 167.10 (11) | O5W—Ag3—N11              | 129.72 (12) |
| N2—Ag1—N14              | 121.83 (10) | N10—Ag3—N11              | 73.07 (11)  |
| N13—Ag1—N14             | 71.03 (10)  | N8—Ag4—N16               | 154.58 (11) |
| N2—Ag1—N1               | 70.05 (11)  | N8—Ag4—N18               | 113.90 (11) |
| N13—Ag1—N1              | 105.82 (11) | N16—Ag4—N18              | 71.96 (11)  |
| N14—Ag1—N1              | 110.70 (10) | N8—Ag4—N9                | 70.94 (11)  |
| N2—Ag1—Ag2 <sup>i</sup> | 93.61 (8)   | N13—Ag1—Ag2 <sup>i</sup> | 93.63 (8)   |
| Compound 2              |             |                          |             |
| Ag1—N2                  | 2.070 (9)   | Ag2—I1 <sup>i</sup>      | 2.8672 (13) |
| Ag1—N7 <sup>i</sup>     | 2.085 (8)   | Ag2—Ag3 <sup>ii</sup>    | 3.2554 (17) |
| Ag2—N6                  | 2.411 (8)   | Ag3—N9                   | 2.319 (9)   |
| Ag2—N5                  | 2.465 (9)   | Ag3—N8                   | 2.333 (8)   |
| Ag2—N3                  | 2.475 (9)   | Ag3—I1 <sup>iii</sup>    | 2.6524 (13) |
| Ag2—I1                  | 2.8138 (13) | Ag3—Ag2 <sup>ii</sup>    | 3.2554 (17) |
| N2—Ag1—N7 <sup>i</sup>  | 170.1 (3)   | N6—Ag2—I1 <sup>i</sup>   | 98.6 (2)    |
| N6—Ag2—N5               | 66.6 (3)    | N5—Ag2—I1 <sup>i</sup>   | 122.0 (2)   |
| N6—Ag2—N3               | 132.8 (3)   | N3—Ag2—I1 <sup>i</sup>   | 102.4 (2)   |
| N5—Ag2—N3               | 66.4 (3)    | I1—Ag2—I1 <sup>i</sup>   | 111.25 (3)  |
| N6—Ag2—I1               | 117.4 (2)   | N9—Ag3—N8                | 73.2 (3)    |
| N5—Ag2—I1               | 125.64 (19) | N9—Ag3—I1 <sup>iii</sup> | 156.6 (2)   |
| N3—Ag2—I1               | 93.4 (2)    | N8—Ag3—I1 <sup>iii</sup> | 128.8 (2)   |

Symmetry codes for **1**: (i) 1-x, 1/2-y, z. **2**: (i) -x, 1/2+y, 1/2-z; (ii) -x, 1-y, -z; (iii) x, 1/2-y, -1/2+z.

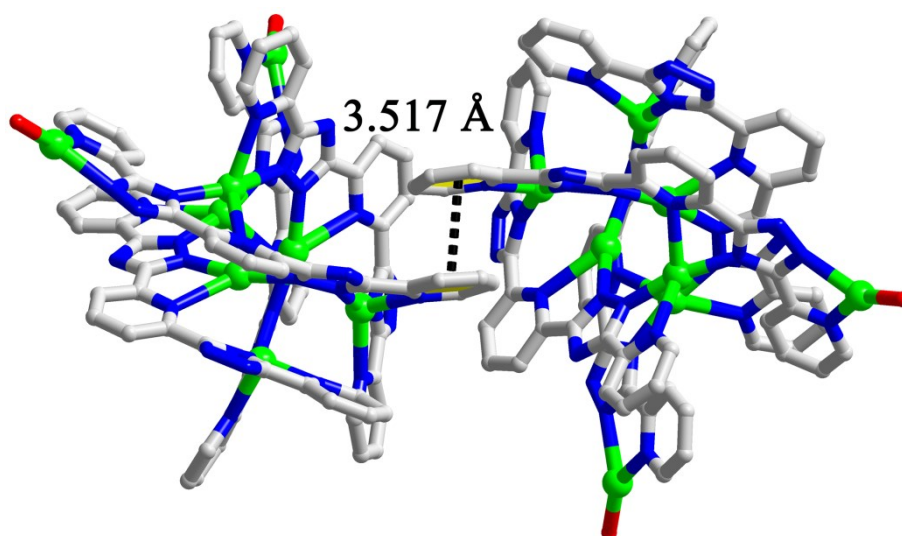

Figure S1.  $\pi \cdots \pi$  stacking interactions in compound 1.

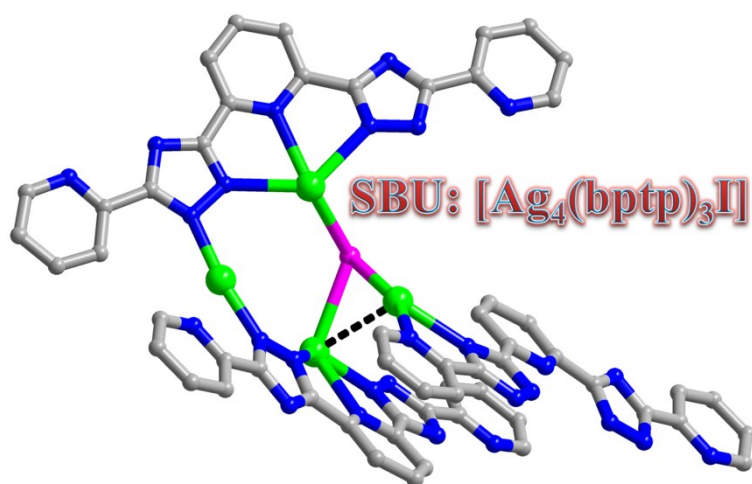

Figure S2. View of the  $[\text{Ag}_4(\text{bptp})_2(\text{H}_2\text{O})]$  subunit in compound 2.

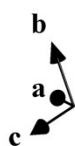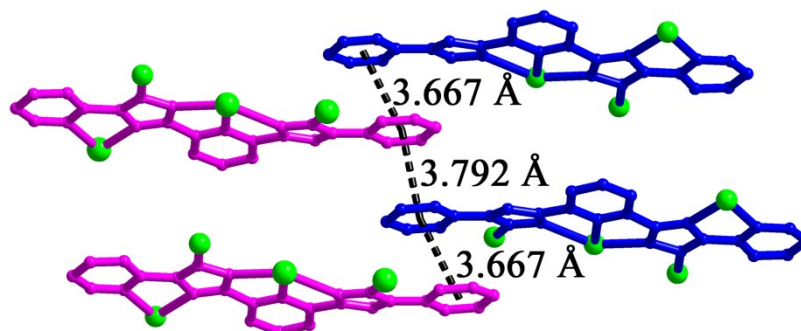

Figure S3.  $\pi \cdots \pi$  stacking interactions in compound 2.

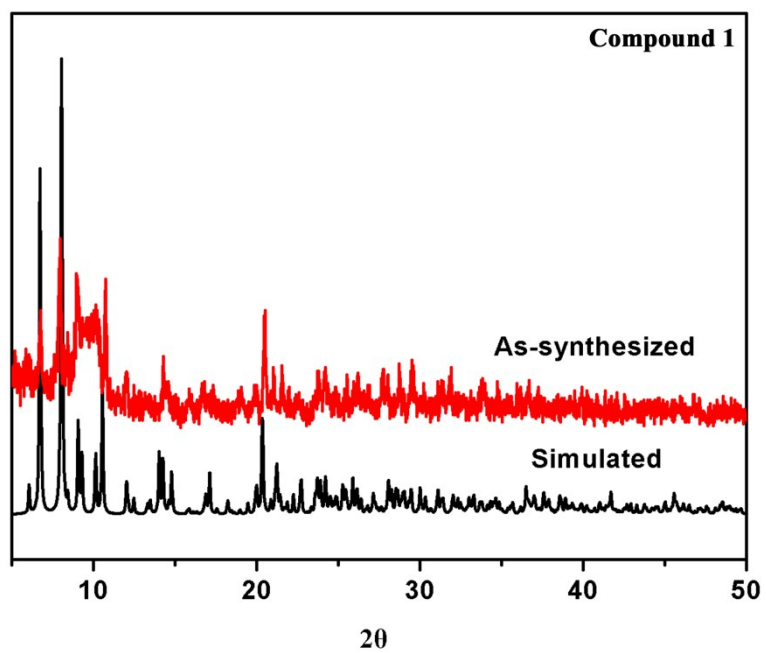

Figure S4. PXRD patterns of simulated from the single-crystal data of compound 1 (black); as-synthesized (red).

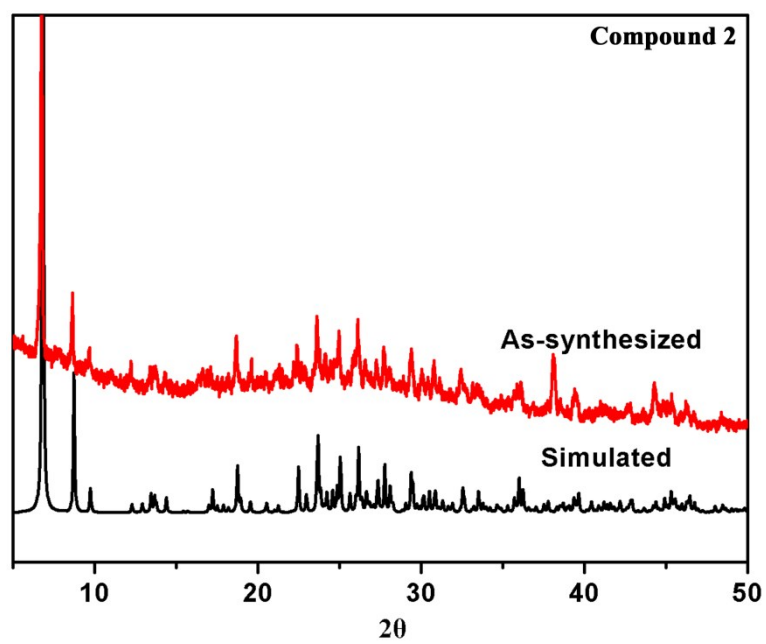

Figure S5. PXRD patterns of simulated from the single-crystal data of compound 2 (black); as-synthesized (red).

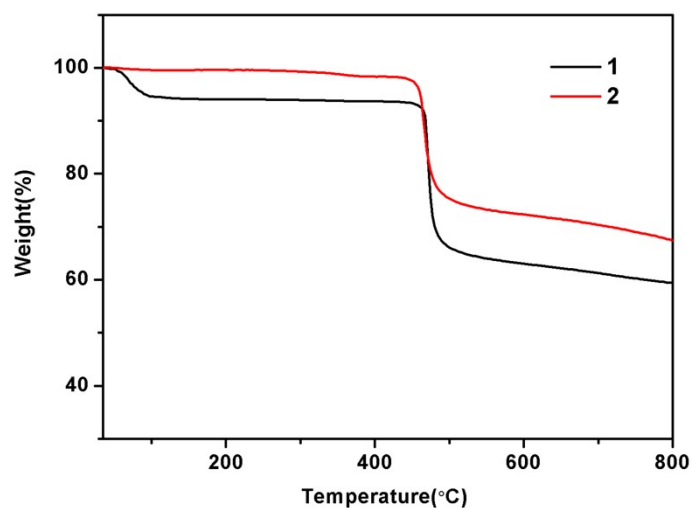

Figure S6. TG curves for compounds **1** and **2**.

**Table S2.** Temperature sensing range for **1** and other reported compounds.

| CPs                                                                                                              | Range (K) | Ref.      |
|------------------------------------------------------------------------------------------------------------------|-----------|-----------|
| $[\text{Ag}_{0.5}(\text{H}_2\text{O})][\text{Ag}_{1.5}(\text{L})(\text{H}_2\text{O})] \cdot 2\text{H}_2\text{O}$ | 100-300   | 1         |
| $[\text{Zn}(\mu_4\text{-}p\text{-tr}_2\text{Ph})(\mu_2\text{-NO}_3)] \cdot \text{NO}_3$                          | 80-210    | 2         |
| $[\text{Tb}_{0.98}\text{Eu}_{0.02}(\text{bdc})_{0.5}(\text{dstp})] \cdot 2\text{H}_2\text{O}$                    | 125-250   | 3         |
| $[\text{Tb}_{0.99}\text{Eu}_{0.01}(\text{bdc})_{0.5}(\text{dstp})] \cdot 2\text{H}_2\text{O}$                    | 100-200   | 3         |
| $[\text{Ag}_9\text{S}(\text{tBuC}_6\text{H}_4\text{S})_6(\text{dpPh})_3(\text{CF}_3\text{SO}_3)]$                | 180-300   | 4         |
| $\text{Tb}_{0.9}\text{Eu}_{0.1}\text{PIA}$                                                                       | 100-300   | 5         |
| $\{[\text{Ag}_4(\text{btp})_2(\text{H}_2\text{O})] \cdot 3.5\text{H}_2\text{O}\}$                                | 77-300    | This work |

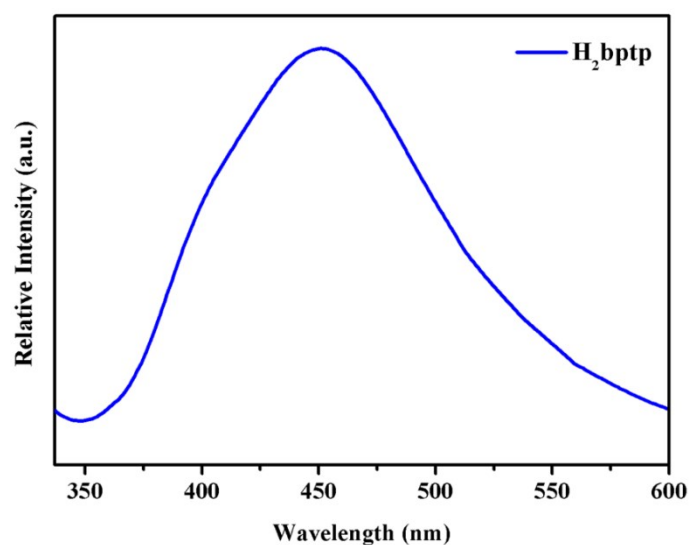

Figure S7. Emission spectra of  $\text{H}_2\text{btp}$  ligand in the solid state.

## References

1. Y. C. He, N. Xu, X. Zheng, Y. Yu, B. Ling and J. You, *Dyes Pigm.*, 2017, **136**, 577-582.
2. Y. J. Qi, Y. J. Wang, X. X. Li, D. Zhao, Y. Q. Sun and S. T. Zheng, *Cryst. Growth Des.*, 2018, **18**, 7383-7390.
3. Y. Wei, R. Sa, Q. Li and K. Wu, *Dalton Trans.*, 2015, **44**, 3067-3074.
4. X. Y. Li, H. F. Su, R. Q. Zhou, S. Feng, Y. Z. Tan, X. P. Wang, J. Jia, M. Kurmoo, D. Sun and L. S. Zheng, *Chem. Eur. J.*, 2016, **22**, 3019-3028.
5. X. Rao, T. Song, J. Gao, Y. Cui, Y. Yang, C. Wu, B. Chen and G. Qian, *J. Am. Chem. Soc.*, 2013, **135**, 15559-15564.
